# Supplementary material
Source: HighWire-hosted journal article supplement (https://www.cmajopen.ca/highwire/filestream/89428/field_highwire_adjunct_files/0/open-2022-0103-1-at.pdf)
Supplement: open-2022-0103-1-at.pdf [file open-2022-0103-1-at.pdf]

**Supplemental Figure 1. Frequency histograms demonstrating the distribution of hospital length of stay in the derivation and validation cohorts.**

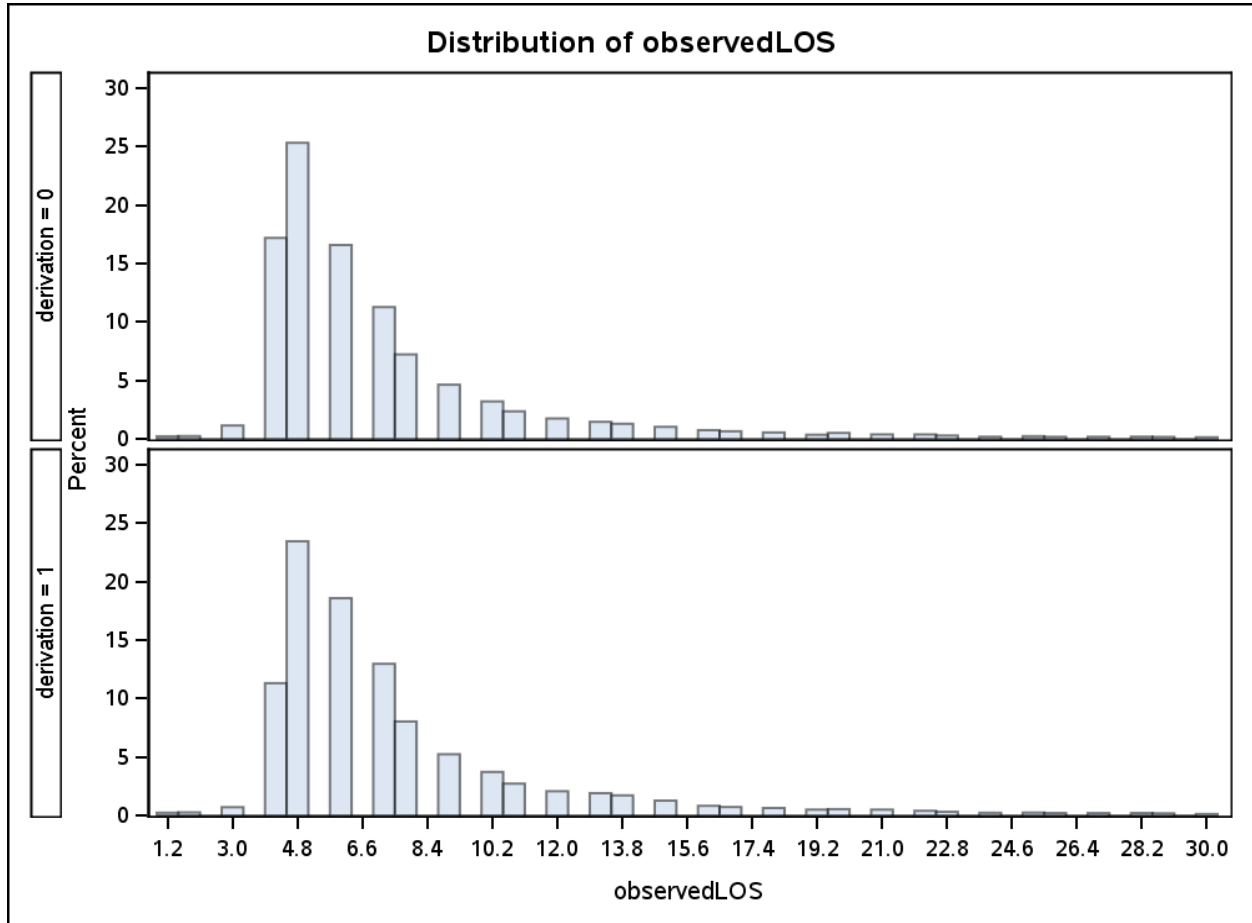

Appendix 1, as supplied by the authors. Appendix to: Fottinger A, Eddeen AB, Lee DS, et al. Derivation and validation of pragmatic clinical models to predict hospital length of stay after cardiac surgery in Ontario, Canada: a population-based cohort study. *CMAJ Open* 2023. doi:10.9778/cmajo.2022-0103. Copyright © 2023 The Author(s) or their employer(s). To receive this resource in an accessible format, please contact us at [cmajgroup@cmaj.ca](mailto:cmajgroup@cmaj.ca).
